# Supplementary material for: DNA binding of the anti-cancer platinum complex trans-[{Pt(NH3)2Cl}2μ-dpzm]2+
Source: Royal Society of Chemistry journal article supplement (doi:10.1039/b306417d), 2003-01-01
Supplement: captions.pdf [file captions.pdf]

## DNA binding of the anti-cancer platinum complex

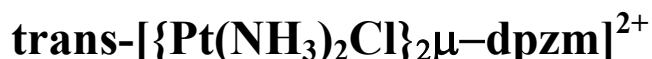

Nial J. Wheate,<sup>a,b</sup> Ben Evison,<sup>c</sup> Tony Herlt,<sup>d</sup> Don R. Phillips<sup>c</sup>  
and J. Grant Collins<sup>a\*</sup>

### Supplementary Information

**Figure S1** The <sup>195</sup>Pt NMR spectrum of (A) di-Pt and (B) di-Pt after 24 h reaction with guanosine.

**Figure S2** The <sup>1</sup>H NMR spectrum of (A) di-Pt and adenosine after 1 week at 60 °C and (B) one spectrum in a T1 experiment from which AH2 assignments were made. Free adenosine aromatic proton resonances are observed at 8.34 and 8.28 ppm.

**Figure S3** The <sup>195</sup>Pt NMR spectrum of di-Pt after reaction with adenosine for 1 week showing the two different PtN<sub>4</sub> species formed.

**Figure S4** The <sup>1</sup>H NOESY spectrum showing the aromatic H8/H6 to sugar H2'/H2'' region of the oligonucleotide d(ATG\*CAT)<sub>2</sub> bound by di-Pt. Of note is the lack of sequential NOEs between T<sub>2</sub> and G<sub>3</sub> and C<sub>4</sub> and A<sub>5</sub>. The strongest sequential NOE is seen between the G<sub>3</sub> and C<sub>4</sub> bases.
